# Supplementary material
Source: HighWire-hosted journal article supplement (https://cmaj.ca/highwire/filestream/148687/field_highwire_adjunct_files/6/221219-guide-5-at.pdf)
Supplement: 221219-guide-5-at.pdf [file 221219-guide-5-at.pdf]

## Appendix 5: Accuracy of risk assessment tools (calibrated for Canada)

| Outcome <sup>*</sup><br>Studies; sample size                                                                    | Findings                                                                                                                                                                                                                                                                                                                                   | Certainty of calibration <sup>†</sup> | Discrimination <sup>‡</sup> (pooled AUC, 95% CI)                                                 |
|-----------------------------------------------------------------------------------------------------------------|--------------------------------------------------------------------------------------------------------------------------------------------------------------------------------------------------------------------------------------------------------------------------------------------------------------------------------------------|---------------------------------------|--------------------------------------------------------------------------------------------------|
| <b>Clinical FRAX (lower risk of bias studies)</b>                                                               |                                                                                                                                                                                                                                                                                                                                            |                                       |                                                                                                  |
| <b>10-year hip fractures</b><br>3 cohort; 67,611<br>(1–3)                                                       | All studies used the FRAX tool calibrated for Canada. The pooled O:E showed acceptable calibration with some underestimation of the observed fracture risk, and a wide confidence interval (pooled O:E 1.13, 95% CI 0.74-1.72, I <sup>2</sup> =89.2%).                                                                                     | Low <sup>b,d</sup>                    | All studies, regardless of risk of bias:<br>Females: 0.76 (0.72-0.81)<br>Males: 0.73 (0.68-0.77) |
| <b>10-year clinical fragility fractures</b><br>3 cohort; 67,611<br>(1–3)                                        | All studies used the FRAX tool calibrated for Canada. The pooled O:E showed acceptable calibration with some underestimation of the observed fracture risk (O:E 1.10, 95% CI 1.01-1.20, I <sup>2</sup> =50.4%).                                                                                                                            | Moderate <sup>b,d</sup>               | All studies, regardless of risk of bias:<br>F: 0.67 (0.65-0.68)<br>M: 0.62 (0.61-0.64)           |
| <b>5-y hip fractures</b><br>1 cohort; 68,730 (62,275 females, 6,445 males)<br>(3)                               | A single study, which used the FRAX tool calibrated for Canada, showed large overestimation of the observed 5-year risk of hip fracture in females (O:E 0.68, 95% CI 0.62-0.73) and imprecise overestimation in males (O:E 0.82, 95% CI 0.60- 1.03).                                                                                       | Low <sup>a,b,d</sup>                  | Not reported                                                                                     |
| <b>5-year clinical fragility fractures<sup>8</sup></b><br>1 cohort; 68,730 (62,275 females, 6,445 males)<br>(3) | A single study, which used the FRAX tool calibrated for Canada, found acceptable calibration in females (O:E 0.93, 95% CI 0.89-0.96). The tool imprecisely underestimated the observed fracture risk in males (O:E 1.23, 95% CI 1.08-1.38).                                                                                                | Low <sup>a,b,d</sup>                  | Not reported                                                                                     |
| <b>FRAX + BMD (lower risk of bias studies)</b>                                                                  |                                                                                                                                                                                                                                                                                                                                            |                                       |                                                                                                  |
| <b>10-year hip fractures</b><br>3 cohort; 61,156 (1–3)                                                          | All studies used the FRAX tool calibrated for Canada. The pooled O:E showed underestimation of the observed risk with a high level of inconsistency (O:E 1.31, 95% CI 0.91-2.13, I <sup>2</sup> = 92.7%); two comparisons showed acceptable calibration while two others showed substantial underestimation of the observed fracture risk. | Low <sup>b,d</sup>                    | All studies, regardless of risk of bias:<br>Females: 0.79 (0.76-0.81)<br>Males: 0.76 (0.72-0.80) |
| <b>10-year clinical fragility fractures</b><br>3 cohort; 61,156 (1–3)                                           | All studies used the FRAX tool calibrated for Canada. The pooled O:E showed acceptable calibration with some underestimation of the observed risk (O:E 1.16, 95% CI 1.12-1.20, I <sup>2</sup> = 0%).                                                                                                                                       | Moderate <sup>b,d</sup>               | All studies, regardless of risk of bias:<br>Females: 0.70 (0.68-0.71)<br>Males: 0.67 (0.66-0.68) |
| <b>5-year hip fractures<sup>8</sup></b><br>1 cohort; 68,730 (62,275 females, 6,445 males)<br>(3)                | A single study, which used the FRAX tool calibrated for Canada, showed acceptable calibration with some overestimation in females (O:E 0.88, 95% CI 0.81-0.95) and males (O:E 0.88, 95% CI 0.65-1.10).                                                                                                                                     | Low <sup>b,d</sup>                    | Not reported                                                                                     |
| <b>5-year clinical fragility fractures<sup>8</sup></b><br>1 cohort; 68,730 (62,275 females, 6,445 males)<br>(3) | A single, which used the FRAX tool calibrated for Canada, study provided inconsistent findings, showing acceptable calibration in females (O:E 1.00, 95% CI 0.97-1.04). The tool imprecisely underestimated the observed fracture risk in males (O:E 1.22, 95% CI 1.07, 1.37).                                                             | Low <sup>a,b,d</sup>                  | Not reported                                                                                     |
| <b>CAROC (includes BMD)</b>                                                                                     |                                                                                                                                                                                                                                                                                                                                            |                                       |                                                                                                  |
| <b>10-year clinical fragility fractures</b><br>1 cohort; 34,060 (4)                                             | Study did not report an O:E ratio. Observed fracture risk (95% CI) was 6.4 (6.0-6.8)% in the low risk (<10%) group, 13.8 (13.1-14.5)% in the moderate risk group (10-20%), and 23.8 (22.5-25.0)% in the high risk group (>20%).                                                                                                            | Low <sup>a,c</sup>                    | Not reported                                                                                     |

AUC=Area under the curve; BMD=bone mineral density; CI=confidence interval; F=female; M=male; O:E ratio=ratio of observed to expected (predicted) events

a=risk of bias; b=inconsistency; c=indirectness; d=imprecision

\*Rows for 5-year fractures have been omitted from the table when no studies were located that reported on this outcome.

† When our assessment of the certainty of evidence fell between levels, we assigned the level that best represented our actual certainty.

‡Extracted directly from Viswanathan et al., 2018 (5).

## References

1. Crandall CJ, Schousboe JT, Morin SN, Lix LM, Leslie W. Performance of FRAX and FRAX-Based Treatment Thresholds in Women Aged 40 Years and Older: The Manitoba BMD Registry. *J Bone Miner Res.* 2019 Aug 17;34(8):1419–27.
2. Fraser L-A, Langsetmo L, Berger C, Ioannidis G, Goltzman D, Adachi JD, et al. Fracture prediction and calibration of a Canadian FRAX® tool: a population-based report from CaMos. *Osteoporos Int.* 2011 Mar 16;22(3):829–37.
3. Leslie WD, Majumdar SR, Morin SN, Lix LM, Johansson H, Oden A, et al. FRAX for fracture prediction shorter and longer than 10 years: the Manitoba BMD registry. *Osteoporos Int.* 2017 Sep 7;28(9):2557–64.
4. Leslie WD, Majumdar SR, Lix LM, Josse RG, Johansson H, Oden A, et al. Direct comparison of FRAX(R) and a simplified fracture risk assessment tool in routine clinical practice: a registry-based cohort study. *Osteoporos Int.* 2016 Nov;27(9):2689–95.
5. Viswanathan M, Reddy S, Berkman N, Cullen K, Middleton JC, Nicholson WK, et al. Screening to Prevent Osteoporotic Fractures: An Evidence Review for the U.S. Preventive Services Task Force. Evidence Synthesis No.162. Rockville, MD: Agency for Healthcare Research and Quality; 2018.
